thesiologists from staying in the magnet room during MRI scans. We have not found any studies of MRI-induced injury to healthcare personnel from long-term exposure to EMFs or any studies correlating exposure levels to disease. Anesthesia personnel who provide limited or occasional care in the MRI environment run a risk of exposure to EMFs.<sup>3,4</sup> Anesthesia providers should carefully consider their anesthetic technique to minimize the time spent in the MRI magnet room. In the future, exposure limits to EMFs should be recorded by anesthesia personnel to facilitate future epidemiologic studies to determine EMF exposure rates. More research is required in developing anesthetic techniques to minimize the EMF exposure limits.

**Yvon Bryan, M.D.,† Lauren Hoke, B.S., T. Wesley Templeton, M.D., Leah Templeton, M.D., Thomas A. Taghon, D.O.** †Wake Forest University School of Medicine, Winston-Salem, North Carolina. ybryan@wfubmc.edu

## References

1. Roh JH, Kim DW, Lee SJ, Kim JY, Na SW, Choi SH, Kim KJ: Intensity of extremely low-frequency electromagnetic fields produced in operating rooms during surgery at the standing position of anesthesiologists. *ANESTHESIOLOGY* 2009; 111:275–8
2. Riches SF, Collins DJ, Charles-Edwards GD, Shafford JC, Cole J, Keevil SF, Leach MO: Measurements of occupational exposure to switched gradient and spatially-varying magnetic fields in areas adjacent to 1.5 T clinical MRI systems. *J Magn Reson Imaging* 2007; 26:1346–52
3. Henderson M. EU directive doesn't scan; junk medicine MRI scans. *The Times* (London) December 20, 2008: 53
4. Smith R. MRI scanners to be examined for cancer risk. *The Daily Telegraph* (London) May 22, 2008: 8

(Accepted for publication November 23, 2009.)

## In Reply:

We appreciate the comments from Bryan *et al.* regarding our article<sup>1</sup> that is related to electromagnetic fields (EMFs) in operating rooms, but magnetic resonance imaging (MRI) magnetic rooms. The anesthesiologists have been exposed to a large amount of EMFs in MRI magnetic rooms because of the recent lack of EMF-safe monitors and machines in an MRI environment. However, there is no specific study about the amount of EMFs in MRI magnetic rooms related to the anesthesiologist and long-term effects of EMFs to the anesthesiologist in an MRI environment. We agree with your opinion that anesthesiologists should consider minimizing the time spent in the MRI magnetic room and should start an epidemiological study for the anesthesiologists working in an MRI environment.

European directive 2004/40/EC on occupational exposure to EMFs was to be implemented in the Member States of the European Union by 2008. Because of some unexpected problems, the deadline was postponed until 2012.<sup>2</sup> Now is the time, we think, for all anesthesiologists to be interested in their working environment, especially EMFs in operating rooms, MRI magnetic rooms, and intensive care units.

**Jang Ho Roh, M.D., Ph.D., Deok Won Kim, Ph.D., Sung Jin Lee, M.D., Ph.D., Ji Young Kim, M.D., Sung Won Na, M.D., Ph.D., Seung Ho Choi, M.D., Ph.D., Ki Jun Kim, M.D., Ph.D.\*** \*Anesthesia and Pain Research Institute, Yonsei University College of Medicine, Seoul, Korea. kkj6063@yuhs.ac

## References

1. Roh JH, Kim DW, Lee SJ, Kim JY, Na SW, Choi SH, Kim KJ: Intensity of extremely low-frequency electromagnetic fields produced in operating rooms during surgery at the standing position of anesthesiologists. *ANESTHESIOLOGY* 2009; 111:275–8
2. Hansson MK, Alanko T, Decat G, Falsaperla R, Gryz K, Hietanen M, Karpowicz J, Rossi P, Sandström M: Exposure of workers to electromagnetic fields. A review of open questions on exposure assessment techniques. *Int J Occup Saf Ergon* 2009; 15:3–33

(Accepted for publication November 23, 2009.)

## Implicit Memory Phenomena under Anesthesia Are Not Spurious

### To the Editor:

I read with great interest the article by Hadzidiakos *et al.*<sup>1</sup> in the August issue of *ANESTHESIOLOGY*. These investigators conducted a study of memory function under anesthesia using the process dissociation procedure (PDP), a method that my colleagues and I have used in the same context in the past.<sup>2–4</sup> In contrast to our studies, Hadzidiakos *et al.* report no evidence of memory function in terms of word stem completion test performance, a discrepancy for which the authors provide plausible explanations such as the depth of anesthesia and midazolam premedication. However, notwithstanding their null finding, one of the PDP models—the original—produced parameters suggesting the presence of controlled (explicit) and automatic (implicit) memory processes. By extending the model to include guessing parameters, the authors go on to show that the original model produces faulty estimates and that other published results using the original model are faulty. That is, Hadzidiakos *et al.* find no evidence of any memory processes in three of the four inspected studies when the extended measurement model is applied. They conclude that in these studies there was no contribution (*i.e.*, evidence) of memory at all and that past findings are spurious.

I take issue with this conclusion for several reasons. Foremost, a model that generates discrepant parameters depending on its assumptions or underlying structure should not invalidate the behavioral findings it attempts to model. When significant differences are found in patients' postoperative behavioral responses to old material presented under anesthesia *versus* new material not presented before, this difference is real and evidences memory for old material regardless of how the underlying process is labeled. Dismissing these behavioral observations ignores an overwhelming body of evidence in favor of implicit memory ("priming") phenomena in the cognitive psychology and neurology literature and surely cannot have been the intent of Hadzidiakos *et al.*
